# Supplementary material
Source: PubMed Central journal article supplement (PMC4426045)
Supplement: NIHMS668210-supplement.pdf [file NIHMS668210-supplement.pdf]

Supplemental Information.

Table S1. HSV-tk mutation frequencies and microsatellite specificity for Pol  $\beta$  WT and variants.

| Region                    | HSV-tk Frequency x 10 <sup>-4</sup> |                 |              |
|---------------------------|-------------------------------------|-----------------|--------------|
|                           | WT                                  | I260Q           | Y265W        |
| <b>[G]<sub>10</sub></b>   |                                     |                 |              |
| <b>Observed</b>           | 490 ± 21 (69) <sup>a</sup>          | 550 ± 250 (42)  | 760 (53)     |
| <b>Microsatellite</b>     | 380 (32, 23) <sup>b</sup>           | 560 (27, 10)    | 140 (15, 19) |
| <b>[C]<sub>10-R</sub></b> |                                     |                 |              |
| <b>Observed</b>           | 280 ± 50 (44)                       | 560 ± 56 (48)   | 1000 (43)    |
| <b>Microsatellite</b>     | 300 (16,24)                         | 690 (33, 8)     | 560 (11, 11) |
| <b>[C]<sub>10</sub></b>   |                                     |                 |              |
| <b>Observed</b>           | 630 ± 230 (71)                      | 1300 ± 400 (45) | 830 (30)     |
| <b>Microsatellite</b>     | 520 (4, 64)                         | 1900 (3, 38)    | 580 (2, 19)  |
| <b>[G]<sub>9</sub></b>    |                                     |                 |              |
| <b>Observed</b>           | 190 ± 60 (28)                       | n.d.            | n.d.         |
| <b>Microsatellite</b>     | 200 (20,5)                          |                 |              |
| <b>[A]<sub>8</sub></b>    |                                     |                 |              |
| <b>Observed</b>           | 400 ± 75 (80) <sup>c</sup>          | 480 ± 190 (30)  | 710 (33)     |
| <b>Microsatellite</b>     | 390 (1, 76)                         | 630 (1, 27)     | 470 (2, 20)  |
| <b>[T]<sub>8</sub></b>    |                                     |                 |              |
| <b>Observed</b>           | 380 ± 82 (81) <sup>c</sup>          | 1200 ± 350 (46) | 1000 (54)    |
| <b>Microsatellite</b>     | 350 (0, 74)                         | 1100 (1, 37)    | 720 (6, 29)  |

<sup>a</sup> Mean of two or three experiments ± standard deviation. Number in parentheses is the total independent mutants isolated from two polymerase reactions.

<sup>b</sup> Number of (insertions, deletions)

<sup>c</sup> Data taken from Ananda et al. 2014 [43].

**Table S2. Pol  $\alpha$ -primase and  $\eta$  HSV-tk mutant frequencies and microsatellite specificity.**

| Region                      | HSV-tk Frequency x 10 <sup>-4</sup> |               |
|-----------------------------|-------------------------------------|---------------|
|                             | Pol $\alpha$ -primase               | Pol $\eta$    |
| <b>[G]<sub>9</sub></b>      |                                     |               |
| <b>Observed</b>             | 41 ± 19 (29) <sup>a</sup>           | 390 ± 99 (44) |
| <b>Microsatellite</b>       | 45 (3,26) <sup>b</sup>              | 200 (7,11)    |
| <b>[C]<sub>10</sub></b>     |                                     |               |
| <b>Observed</b>             | 150 ± 6 (36)                        | 800 ± 76 (46) |
| <b>Microsatellite</b>       | 140 (6,29)                          | 320 (0,15)    |
| <b>[A]<sub>8</sub></b>      |                                     |               |
| <b>Observed<sup>c</sup></b> | 55 (77)                             | 260 (67)      |
| <b>Microsatellite</b>       | 51 (7,64)                           | 180 (0, 41)   |
| <b>[T]<sub>8</sub></b>      |                                     |               |
| <b>Observed<sup>c</sup></b> | 47 (77)                             | 640 (29)      |
| <b>Microsatellite</b>       | 45 (13,61)                          | 230 (1,15)    |

<sup>a</sup> Mean of two or three experiments ± standard deviation. Number in parentheses is the total independent mutants isolated from two polymerase reactions.

<sup>b</sup> Number of (insertions, deletions)

<sup>c</sup> Data taken from Ananda et al. 2014 [43].

**Figure S1. Microsatellite constructs used in the HSV-tk experimental assay.** **A.** Sequence of the experimental target sequence within the HSV-tk gene, from the MluI to StuI restriction sites. The large arrow shows the approximate position where the microsatellite (TR, tandem repeat) of interest is inserted in-frame within the target. Endogenous (HSV-tk-encoded) two-unit mononucleotide and dinucleotide repeats are shown in red and blue, respectively. **B.** Construction of the A<sub>8</sub>, T<sub>8</sub>, G<sub>10</sub> and C<sub>10</sub> mononucleotide-containing HSV-tk templates.

| A. Target Template Sequence                                                |                  |                 |                  |                 |                   |                 |                   |
|----------------------------------------------------------------------------|------------------|-----------------|------------------|-----------------|-------------------|-----------------|-------------------|
| ↓ MluI                                                                     |                  |                 |                  | ↓ TR            |                   |                 |                   |
| 5' CAC GCG TCT GCG TTC GAC CAG GCT GCG CGT ICT CGA GGC CAT AGC AAC CGA CGT |                  |                 |                  |                 |                   |                 |                   |
|                                                                            |                  |                 |                  | ↓ StuI          |                   |                 |                   |
| ACG GCG TTG CGC CCT CGC CCG CAG CAA GAA GCC ACG GAA GTC AGG CCT GAG CAG 3' |                  |                 |                  |                 |                   |                 |                   |
| B. Sequences at Mononucleotide TR Insertion Site                           |                  |                 |                  |                 |                   |                 |                   |
| HSV-tk Sequence                                                            | Length           | HSV-tk Sequence | Length           | HSV-tk Sequence | Length            | HSV-tk Sequence | Length            |
| GCGTTTTTTTCTC                                                              | [T] <sub>8</sub> | GCGAAAAAAAACTC  | [A] <sub>8</sub> | GCGGGGGGGGGTT   | [G] <sub>10</sub> | GCCCCCCCCCGTT   | [C] <sub>10</sub> |

**Figure S2: Interruption errors within mononucleotide microsatellite alleles.** All interruption mutations recovered from each template in all conditions are shown below. Insertions of bases other than the mononucleotide repeat are demarcated below the affected sequence with a black triangle with the inserted base shown below the triangle. Base substitution events are noted above the affected sequence with the identity of the substituted base. A. [T]<sub>8</sub> template, 20 μM dATP, 250 μM other three dNTPs. B. [A]<sub>8</sub> template, all four dNTPs 250 μM. C. [A]<sub>8</sub> template 20 μM dTTP, 250 μM other three dNTPs. \*Indicates deletion of 6 As and base substitution of 2 Ts to As in one mutant. D. [G]<sub>9</sub> template, all four dNTPs 250 μM.

|                                                                                                                                                                                                      |  | Interruption<br>frequency x 10 <sup>-4</sup><br>per template base<br>pair |
|------------------------------------------------------------------------------------------------------------------------------------------------------------------------------------------------------|--|---------------------------------------------------------------------------|
| <p>A. [T]<sub>8</sub> 20/250</p> <pre>           C           G           C 5'   C  G  T   T  T  T   T  T  T   T  C           ▲   ▲   ▲           A   G   G                    G   G           </pre> |  | 18                                                                        |
| <p>B. [A]<sub>8</sub> 250/250</p> <pre>           T           T 5'   C  G  A   A  A  A   A  A  A   A  C           </pre>                                                                             |  | 2.3                                                                       |
| <p>C. [A]<sub>8</sub> 20/250</p> <pre>           T           Δ 5'   C  G  A   A  A  A   A  A  A   T  T  *           </pre>                                                                           |  | 2.0                                                                       |
| <p>D. [G]<sub>9</sub> 250/250</p> <pre> 5'   C  G  G   G  G  G   G  G  G   ▲           A           </pre>                                                                                            |  | 0.44                                                                      |
